# Supplementary material for: Guidelines and definitions for research on epithelial–mesenchymal transition
Source: PubMed Central journal article supplement (PMC7250738; doi:10.1038/s41580-020-0237-9), 2020-04-16
Supplement: 41580_2020_237_MOESM1_ESM.pdf [file 41580_2020_237_MOESM1_ESM.pdf]

**Supplementary information**

---

**Guidelines and definitions for research on  
epithelial–mesenchymal transition**

---

In the format provided by the  
authors and unedited

**Supplementary Table:****Additional transcription factors associated with EMT and key studies reporting their discovery in the context of development, cancer and fibrosis.**

| <b>Transcription factor*</b>   | <b>Type</b>             | <b>Development</b>        | <b>Cancer</b>                           | <b>Fibrosis</b>        |
|--------------------------------|-------------------------|---------------------------|-----------------------------------------|------------------------|
| <b>Alx1</b>                    | Homeobox                | Saunders & McClay, 2014   | Yuan et al., 2013                       | -                      |
| <b>AP1 (Jun/Fos Atf)</b>       | Ap1                     | Reichmann et al., 1992    | Bakiri et al. 2015                      | Alcorn et al., 2009    |
| <b>Brachyury (T)</b>           | T-box                   | Beddington et al., 1992   | Fernando et al., 2010                   | Sun et al., 2014       |
| <b>CBF-A (NF-YA)</b>           | CCAT box binding        | -                         | Venkov et al., 2007                     | Venkov et al., 2007    |
| <b>E2-2 (TCF4)</b>             | bHLH                    | Sobrado et al., 2009      | Sobrado et al., 2009                    | -                      |
| <b>E47 (TCF3)</b>              | bHLH                    | Perez-Moreno et al., 2001 | Perez-Moreno et al., 2001               | Slattery et al., 2006  |
| <b>Erg</b>                     | ETS                     | Saunders & McClay, 2014   | Petrovics et al., 2005                  | -                      |
| <b>Ets1</b>                    | ETS                     | Fafeur et al., 1997       | Nakayama et al., 1996                   | Nakamura et al., 2004. |
| <b>FoxC2 (FoxB)</b>            | Forkhead                | Saunders & McClay, 2014   | Mani et al., 2007                       | Sipos & Galamb, 2012   |
| <b>GATA4/6 (Srp)</b>           | GATA                    | Campbell et al, 2011      | -                                       | -                      |
| <b>Gooseoid (GSC)</b>          | Homeobox                | Blum et al., 1992         | Hartwell et al., 2006                   | -                      |
| <b>HoxB7</b>                   | Homeobox                | -                         | Wu et al, 2006                          | -                      |
| <b>Id1</b>                     | HLH                     | Jen et al., 1996          | Tobin et al, 2011                       | Li et al., 2007        |
| <b>KLF2</b>                    | Sp/KLF                  | Chiplunkar et al., 2013   | -                                       | -                      |
| <b>Klf4</b>                    | Klf                     | Liu et al., 2012          | Lin et al., 2012                        | Tiwari et al., 2013    |
| <b>KLF6 (Z9f)</b>              | Sp/KLF                  | -                         | -                                       | Holian et al., 2008    |
| <b>KLF8</b>                    | Sp/KLF                  | -                         | Wang et al, 2007                        | -                      |
| <b>NF-<math>\kappa</math>b</b> | NF- $\kappa$ B/Rel      | DeLaughter et al., 2016   | Huber et al, 2004                       | Sunami et al., 2012    |
| <b>Prrx1</b>                   | Paired related homeobox | Ocana et al. 2012         | Ocana et al., 2012; Takano et al., 2016 | Gong et al., 2017      |
| <b>Runx2</b>                   | Runt-related            | Tavares et al. 2017       | Pratap et al., 2005                     | Mummler et al., 2018   |

|                        |          |                          |                                            |                             |
|------------------------|----------|--------------------------|--------------------------------------------|-----------------------------|
| <b>Six1</b>            | Homeobox | Grifone et al., 2005     | Micalizzi et al., 2009; McCoy et al., 2009 | Smith et al., 2008          |
| <b>Sox4</b>            | Homeobox | Zhang et al, 2012        | Liu et al., 2006                           | Xiao et al., 2015           |
| <b>Sox9</b>            | Homeobox | Akiyama et al., 2004     | Acevedo et al., 2007                       | Hanley et al., 2008         |
| <b>Tbx3</b>            | T-box    | Singh et al., 2012       | Rodriguez et al. 2008                      | Wensing & Campos, 2014      |
| <b>Tead (Yap/Taz)</b>  | Tead     | Diepenbruck et al., 2014 | Overholtzer et al., 2006                   | Seo et al 2016              |
| <b>Tgif1</b>           | Homeobox | Saunders & McClay, 2014  | Xiang et al., 2015                         | -                           |
| <b>Twist2 (Dermo1)</b> | bHLH     | -                        | Ansieau et al., 2008                       | Grunz-Borgmann et al., 2017 |

\*Transcription factors with a minimum of 10 citations in the EMT literature. “-“ indicates lack of a pertinent reference.

## References:

- Acevedo, V.D., Gangula, R. D., Freeman, K. W., Li, R. L., Zhang, Y. Y., Wang, F., Ayala, G. E., Peterson, L. E., Ittmann, M. & Spencer, D. M. Inducible FGFR-1 activation leads to irreversible prostate adenocarcinoma and an epithelial-to-mesenchymal transition. *Cancer Cell* 12, 559-571 (2007).
- Akiyama, H., Chaboissier, M. C., Behringer, R. R., Rowitch, D. H., Schedl, A., Epstein, J. A. & de Crombrughe, B. Essential role of Sox9 in the pathway that controls formation of cardiac valves and septa. *Proc Natl Acad Sci U S A* 101, 6502-6507 (2004).
- Alcorn, J.F., van der Velden, J., Brown, A. L., McElhinney, B., Irvin, C. G. & Janssen-Heininger, Y. M. W. c-Jun N-Terminal Kinase 1 Is Required for the Development of Pulmonary Fibrosis. *American Journal of Respiratory Cell and Molecular Biology* 40, 422-432 (2009).
- Ansieau, S., Bastid, J., Doreau, A., Morel, A. P., Bouchet, B. P., Thomas, C., Fauvet, F., Puisieux, I., Doglioni, C., Piccinin, S., Maestro, R., Voeltzel, T., Selmi, A., Valsesia-Wittmann, S., Caron de Fromentel, C. & Puisieux, A. Induction of EMT by twist proteins as a collateral effect of tumor-promoting inactivation of premature senescence. *Cancer Cell* 14, 79-89 (2008).
- Bakiri, L., Macho-Maschler, S., Custic, I., Niemiec, J., Guio-Carrion, A., Hasenfuss, S. C., Eger, A., Muller, M., Beug, H. & Wagner, E. F. Fra-1/AP-1 induces EMT in mammary epithelial cells by modulating Zeb1/2 and TGF beta expression. *Cell Death Differ* 22, 336-350 (2015).
- Beddington, R.S.P., Rashbass, P.R. & Wilson, V. Brachyury--a gene affecting mouse gastrulation and early organogenesis. *Development*.-Supplement., 157-165 (1992).

- Blum, M., Gaunt, S. J., Cho, K. W., Steinbeisser, H., Blumberg, B., Bittner, D., & De Robertis, E. M. Gastrulation in the mouse: the role of the homeobox gene goosecoid. *Cell* 69, 1097-1106 (1992).
- Campbell, K., Whissell, G., Franch-Marro, X., Batlle, E. & Casanova, J. Specific GATA factors act as conserved inducers of an endodermal-EMT. *Dev Cell* 21, 1051-1061, doi:10.1016/j.devcel.2011.10.005 (2011)
- Chiplunkar, A.R., Lung, T. K., Alhashem, Y., Koppenhaver, B. A., Salloum, F. N., Kukreja, R. C., Haar, J. L. & Lloyd, J. A. Kruppel-like factor 2 is required for normal mouse cardiac development. *Plos One* 8, e54891 (2013).
- DeLaughter, D.M., Clark, C. R., Christodoulou, D. C., Seidman, C. E., Baldwin, H. S., Seidman, J. G. & Barnett, J. V. Transcriptional Profiling of Cultured, Embryonic Epicardial Cells Identifies Novel Genes and Signaling Pathways Regulated by TGFbetaR3 In Vitro. *Plos One* 11, e0159710 (2016).
- Diepenbruck, M., Waldmeier, L., Ivanek, R., Berninger, P., Arnold, P., van Nimwegen, E. & Christofori, G. Tead2 expression levels control the subcellular distribution of Yap and Taz, zyxin expression and epithelial-mesenchymal transition. *Journal of Cell Science* 127, 1523-1536 (2014).
- Fafeur, V., Tulasne, D., Queva, C., Vercamer, C., Dimster, V., Mattot, V., Stehelin, D., Desbiens, X. & Vandembunder, B. The ETS1 transcription factor is expressed during epithelial-mesenchymal transitions in the chick embryo and is activated in scatter factor-stimulated MDCK epithelial cells. *Cell Growth & Differentiation* 8, 655-665 (1997).
- Fernando, R.I., Litzinger, M., Trono, P., Hamilton, D. H., Schlom, J. & Palena, C. The T-box transcription factor Brachyury promotes epithelial-mesenchymal transition in human tumor cells. *J Clin Invest* 120, 533-544 (2010).
- Gong, J., Han, J., He, J. Y., Liu, J. M., Han, P., Wang, Y. W., Li, M. K., Li, D. X., Ding, X. M., Du, Z. P., Liao, J. Z. & Tian, D. Paired related homeobox protein 1 regulates PDGF-induced chemotaxis of hepatic stellate cells in liver fibrosis. *Laboratory Investigation* 97, 1020-1032 (2017).
- Grifone, R., Demignon, J., Houbron, C., Souil, E., Niro, C., Seller, M. J., Hamard, G. & Maire, P. Six1 and Six4 homeoproteins are required for Pax3 and Mrf expression during myogenesis in the mouse embryo. *Development* 132, 2235-2249 (2005).
- Grunz-Borgmann, E.A., Nichols, L.A., Wang, X.H. & Parrish, A.R. Twist2 Is Upregulated in Early Stages of Repair Following Acute Kidney Injury. *Int J Mol Sci* 18 (2017).
- Hanley, K.P., Oakley, F., Sugden, S., Wilson, D. I., Mann, D. A. & Hanley, N. A. Ectopic SOX9 mediates extracellular matrix deposition characteristic of organ fibrosis. *Journal of Biological Chemistry* 283, 14063-14071 (2008).

- Hartwell, K.A., Muir, B., Reinhardt, F., Carpenter, A. E., Sgroi, D. C. & Weinberg, R. A. The Spemann organizer gene, Goosecoid, promotes tumor metastasis. *Proc Natl Acad Sci U S A* 103, 18969-18974 (2006).
- Holian, J., Qi, W., Kelly, D. J., Zhang, Y., nMreich, E., Pollock, C. A. & Chen, X. M. Role of Kruppel-like factor 6 in transforming growth factor-beta1-induced epithelial-mesenchymal transition of proximal tubule cells. *Am J Physiol Renal Physiol* 295, F1388-1396 (2008).
- Huber, M.A., Azoitei, N., Baumann, B., Grunert, S., Sommer, A., Pehamberger, H., Kraut, N., Beug, H. & Wirth, T. NF-kappa B is essential for epithelial-mesenchymal transition and metastasis in a model of breast cancer progression. *Journal of Clinical Investigation* 114, 569-581 (2004).
- Jen, Y., Manova, K. & Benezra, R. Expression patterns of Id1, Id2, and Id3 are highly related but distinct from that of Id4 during mouse embryogenesis. *Developmental Dynamics* 207, 235-252 (1996).
- Li, Y., Yang, J., Luo, J.H., Dedhar, S. & Liu, Y. Tubular epithelial cell dedifferentiation is driven by the helix-loop-helix transcriptional inhibitor Id1. *J Am Soc Nephrol* 18, 449-460 (2007).
- Lin, Z.S., Chu, H.C., Yen, Y.C., Lewis, B.C. & Chen, Y.W. Kruppel-like factor 4, a tumor suppressor in hepatocellular carcinoma cells reverts epithelial mesenchymal transition by suppressing slug expression. *Plos One* 7, e43593 (2012).
- Liu, P.B., Ramachandran, S., Ali Seyed, M., Scharer, C. D., Laycock, N., Dalton, W. B., Williams, H., Karanam, S., Datta, M. W., Jaye, D. L. & Moreno, C. S. Sex-determining region Y box 4 is a transforming oncogene in human prostate cancer cells. *Cancer Research* 66, 4011-4019 (2006).
- Liu, Y.N., Abou-Kheir, W., Yin, J. J., Fang, L., Hynes, P., Casey, O., Hu, D., Wan, Y., Seng, V., Sheppard-Tillman, H., Martin, P. & Kelly, K. Critical and reciprocal regulation of KLF4 and SLUG in transforming growth factor beta-initiated prostate cancer epithelial-mesenchymal transition. *Mol Cell Biol* 32, 941-953 (2012).
- Mani, S.A., Yang, J., Brooks, M., Schwaninger, G., Zhou, A., Miura, N., Kutok, J. L., Hartwell, K., Richardson, A. L. & Weinberg, R. A. Mesenchyme Forkhead 1 (FOXC2) plays a key role in metastasis and is associated with aggressive basal-like breast cancers. *Proceedings of the National Academy of Sciences of the United States of America* 104, 10069-10074 (2007).
- McCoy, E.L., Iwanaga, R., Jedlicka, P., Abbey, N. S., Chodosh, L. A., Heichman, K. A., Welm, A. L. & Ford, H. L. Six1 expands the mouse mammary epithelial stem/progenitor cell pool and induces mammary tumors that undergo epithelial-mesenchymal transition. *J Clin Invest* 119, 2663-2677 (2009).
- Micalizzi, D.S., Christensen, K. L., Jedlicka, P., Coletta, R. D., Baron, A. E., Harrell, J. C., Horwitz, K. B., Billheimer, D., Heichman, K. A., Welm, A. L., Schiemann, W. P. & Ford, H. L. The Six1 homeoprotein induces human mammary carcinoma cells to undergo epithelial-mesenchymal transition and metastasis in mice through increasing TGF-beta signaling. *Journal of Clinical Investigation* 119, 2678-2690 (2009).
- Mummler, C., Burgy, O., Hermann, S., Mutze, K., Gunther, A., & Konigshoff, M. Cell-specific expression of runt-related transcription factor 2 contributes to pulmonary fibrosis. *Faseb Journal* 32, 703-716 (2018).

- Nakamura, Y., Esnault, S., Maeda, T., Kelly, E. A. B., Malter, J. S. & Jarjour, N. N. Ets-1 regulates TNF-alpha-induced matrix metalloproteinase-9 and tenascin expression in primary bronchial fibroblasts. *Journal of Immunology* 172, 1945-1952 (2004).
- Nakayama, T., Ito, M., Ohtsuru, A., Naito, S., Nakashima, M., Fagin, J. A., Yamashita, S. & Sekine, I. Expression of the Ets-1 proto-oncogene in human gastric carcinoma - Correlation with tumor invasion. *American Journal of Pathology* 149, 1931-1939 (1996).
- Ocana, O.H., Corcoles, R., Fabra, A., Moreno-Bueno, G., Acloque, H., Vega, S., Barrallo-Gimeno, A., Cano, A. & Nieto, M. A. Metastatic Colonization Requires the Repression of the Epithelial-Mesenchymal Transition Inducer Prrx1. *Cancer Cell* 22, 709-724 (2012).
- Overholtzer, M., Zhang, J., Smolen, G. A., Muir, B., Li, W., Sgroi, D. C., Deng, C. X., Brugge, J. S. & Haber, D. A. Transforming properties of YAP, a candidate oncogene on the chromosome 11q22 amplicon. *Proceedings of the National Academy of Sciences of the United States of America* 103, 12405-12410 (2006).
- Perez-Moreno, M.A., Locascio, A., Rodrigo, I., Dhondt, G., Portillo, F., Nieto, M. A. & Cano, A. A new role for E12/E47 in the repression of E-cadherin expression and epithelial-mesenchymal transitions. *Journal of Biological Chemistry* 276, 27424-27431 (2001).
- Petrovics, G., Liu, A. J., Shaheduzzaman, S., Furasato, B., Sun, C., Chen, Y. M., Nau, M., Ravindranath, L., Chen, Y. D., Dobi, A., Srikantan, V., Sesterhenn, I. A., McLeod, D. G., Vahey, M., Moul, J. W. & Srivastava, S. Frequent overexpression of ETS-related gene-1 (ERG1) in prostate cancer transcriptome. *Oncogene* 24, 3847-3852 (2005).
- Pratap, J., Javed, A., Languino, L. R., van Wijnen, A. J., Stein, J. L., Stein, G. S. & Lian, J. B. The Runx2 Osteogenic Transcription Factor Regulates Matrix Metalloproteinase 9 in Bone Metastatic Cancer Cells and Controls Cell Invasion. *Molecular and Cellular Biology* 25, 8581-8591 (2005).
- Reichmann, E., Schwarz, H., Deiner, E. M., Leitner, I., Eilers, M., Berger, J., Busslinger, M. & Beug, H. Activation of an inducible c-FosER fusion protein causes loss of epithelial polarity and triggers epithelial-fibroblastoid cell conversion. *Cell* 71, 1103-1116 (1992).
- Rodriguez, M., Aladowicz, E., Lanfrancone, L. & Goding, C.R. Tbx3 represses E-cadherin expression and enhances melanoma invasiveness. *Cancer Research* 68, 7872-7881 (2008).
- Saunders, L.R. & McClay, D.R. Sub-circuits of a gene regulatory network control a developmental epithelial-mesenchymal transition. *Development* 141, 1503-1513 (2014).
- Seo, E., Kim, W. Y., Hur, J., Kim, H., Nam, S. A., Choi, A., Kim, Y. M., Park, S. H., Chung, C., Kim, J., Min, S., Myung, S. J., Lim, D. S. & Kim, Y. K. The Hippo-Salvador signaling pathway regulates renal tubulointerstitial fibrosis. *Scientific Reports* 6 (2016).
- Singh, R. et al. Tbx2 and Tbx3 induce atrioventricular myocardial development and endocardial cushion formation. *Cell Mol Life Sci* 69, 1377-1389 (2012).
- Sipos, F. & Galamb, O. Epithelial-to-mesenchymal and mesenchymal-to-epithelial transitions in the colon. *World J Gastroentero* 18, 601-608 (2012).

- Slattery, C., McMorro, T. & Ryan, M.P. Overexpression of E2A proteins induces epithelial-mesenchymal transition in human renal proximal tubular epithelial cells suggesting a potential role in renal fibrosis. *Febs Letters* 580, 4021-4030 (2006).
- Smith, J.C., Boone, B.E., Opalenik, S.R., Williams, S.M. & Russell, S.B. Gene profiling of keloid fibroblasts shows altered expression in multiple fibrosis-associated pathways. *Journal of Investigative Dermatology* 128, 1298-1310 (2008).
- Sobrado, V.R., Moreno-Bueno, G., Cubillo, E., Holt, L. J., Nieto, M. A., Portillo, F. & Cano, A. The class I bHLH factors E2-2A and E2-2B regulate EMT. *Journal of Cell Science* 122, 1014-1024 (2009).
- Sun, S., Sun, W., Xia, L., Liu, L., Du, R., He, L., Li, R., Wang, H & Huang, C. The T-box transcription factor Brachyury promotes renal interstitial fibrosis by repressing E-cadherin expression. *Cell Commun Signal* 12, 76 (2014).
- Sunami, Y., Leithauser, F., Gul, S., Fiedler, K., Guldiken, N., Espenlaub, S., Holzmann, K. H., Hipp, N., Sindrilari, A., Luedde, T., Baumann, B., Wissel, S., Kreppel, F., Schneider, M., Scharffetter-Kochanek, K., Kochanek, S., Strnad, P. & Wirth, T. Hepatic activation of IKK/NFkappaB signaling induces liver fibrosis via macrophage-mediated chronic inflammation. *Hepatology* 56, 1117-1128 (2012).
- Tavares, A.L.P., Brown, J.A., Ulrich, E.C., Dvorak, K. & Runyan, R.B. Runx2-I is an Early Regulator of Epithelial-Mesenchymal Cell Transition in the Chick Embryo. *Dev Dyn* (2017).
- Tiwari, N., Meyer-Schaller, N., Arnold, P., Antoniadis, H., Pachkov, M., van Nimwegen, E. & Christofori, G. Klf4 Is a Transcriptional Regulator of Genes Critical for EMT, Including Jnk1 (Mapk8). *Plos One* 8 (2013).
- Tobin, N.P., Sims, A.H., Lundgren, K.L., Lehn, S. & Landberg, G. Cyclin D1, Id1 and EMT in breast cancer. *Bmc Cancer* 11, 417 (2011).
- Venkov, C.D., Link, A. J., Jennings, J. L., Plieth, D., Inoue, T., Nagai, K., Xu, C., Dimitrova, Y. N., Rauscher, F. J. & Neilson, E. G. A proximal activator of transcription in epithelial-mesenchymal transition. *Journal of Clinical Investigation* 117, 482-491 (2007).
- Wang, X., Zheng, M., Liu, G., Xia, W., McKeown-Longo, P. J., Hung, M. C. & Zhao, J. Kruppel-like factor 8 induces epithelial to mesenchymal transition and epithelial cell invasion. *Cancer Res* 67, 7184-7193 (2007).
- Wensing, L.A. & Campos, A.H. TBX3, a downstream target of TGF-beta 1, inhibits mesangial cell apoptosis. *Experimental Cell Research* 328, 340-350 (2014).
- Wu, X., Chen, H., Parker, B., Rubin, E., Zhu, T., Lee, J. S., Argani, P. & Sukumar, S. HOXB7, a homeodomain protein, is overexpressed in breast cancer and confers epithelial-mesenchymal transition. *Cancer Res* 66, 9527-9534 (2006).
- Xiang, G., Yi, Y., Weiwei, H. & Weiming, W. TGIF1 promoted the growth and migration of cancer cells in nonsmall cell lung cancer. *Tumour Biol* 36, 9303-9310 (2015).
- Xiao, L., Zhou, X., Liu, F. Y., Hu, C., Zhu, X. J., Luo, Y., Wang, M., Xu, X. X., Yang, S. K., Kanwar, Y. S. & Sun, L. MicroRNA-129-5p modulates epithelial-to-mesenchymal transition by targeting SIP1 and SOX4 during peritoneal dialysis. *Laboratory Investigation* 95, 817-832 (2015).

- Yuan, H., Kajiyama, H., Ito, S., Yoshikawa, N., Hyodo, T., Asano, E., Hasegawa, H., Maeda, M., Shibata, K., Hamaguchi, M., Kikkawa, F. & Senga, T. ALX1 induces snail expression to promote epithelial-to-mesenchymal transition and invasion of ovarian cancer cells. *Cancer Res* 73, 1581-1590 (2013).
- Zhang, J., Liang, Q., Lei, Y., Yao, M., Li, L., Gao, X., Feng, J., Zhang, Y., Gao, H., Liu, D. X., Lu, J. & Huang, B. SOX4 induces epithelial-mesenchymal transition and contributes to breast cancer progression. *Cancer Res* 72, 4597-4608 (2012).
